# Supplementary material for: Trophic Niche Differentiation in Two Sympatric Nuthatch Species (Sitta yunnanensis and Sitta nagaensis)
Source: MDPI journal article supplement (doi:10.3390/ani14081146), 2024-04-10
Supplement: s1 [file s1]

Table S1: *Sitta yunnanensis* and *Sitta nagaensis* Stable isotopes of food resources

| Sample ID | Species     | d13C (‰, PDB) | C content (%) | d15N (‰, Atm-N2) | N content (%) |
|-----------|-------------|---------------|---------------|------------------|---------------|
| 1-1       | Hemiptera   | -26.84        | 53.87         | 3.80             | 9.23          |
| 1-2       | Hemiptera   | -27.21        | 51.30         | 0.27             | 9.75          |
| 1-3       | Hemiptera   | -25.10        | 47.57         | 6.05             | 9.70          |
| 1-4       | Hemiptera   | -20.92        | 50.47         | 2.67             | 9.90          |
| 1-5       | Hemiptera   | -26.75        | 51.51         | 3.19             | 9.99          |
| 1-6       | Hemiptera   | -23.29        | 52.72         | -0.39            | 9.81          |
| 1-7       | Hemiptera   | -26.60        | 66.57         | -2.52            | 4.53          |
| 2-1       | Lepidoptera | -31.68        | 64.38         | 1.94             | 6.62          |
| 2-2       | Lepidoptera | -36.21        | 58.85         | 4.26             | 8.48          |
| 2-3       | Lepidoptera | -31.09        | 47.93         | 4.75             | 11.71         |
| 2-4       | Lepidoptera | -25.16        | 47.60         | 2.57             | 11.03         |
| 2-5       | Lepidoptera | -32.23        | 49.19         | 4.90             | 9.70          |
| 2-6       | Lepidoptera | -32.58        | 69.49         | 6.73             | 3.94          |
| 2-7       | Lepidoptera | -30.50        | 62.89         | 3.18             | 7.85          |
| 2-8       | Lepidoptera | -30.37        | 48.47         | 2.40             | 10.94         |
| 2-9       | Lepidoptera | -28.72        | 50.74         | 2.28             | 12.17         |
| 2-10      | Lepidoptera | -29.26        | 53.57         | 4.97             | 10.68         |
| 2-11      | Lepidoptera | -33.12        | 58.02         | 3.92             | 8.50          |
| 2-12      | Lepidoptera | -23.59        | 49.54         | -3.99            | 11.22         |
| 2-13      | Lepidoptera | -24.42        | 48.34         | -4.26            | 11.79         |
| 2-14      | Lepidoptera | -30.06        | 48.23         | -0.49            | 11.00         |
| 2-15      | Lepidoptera | -26.35        | 50.06         | 4.21             | 12.51         |
| 2-16      | Lepidoptera | -26.46        | 51.92         | 4.90             | 10.75         |
| 2-17      | Lepidoptera | -29.44        | 56.39         | -1.66            | 8.36          |

|      |             |        |       |       |       |
|------|-------------|--------|-------|-------|-------|
| 3-1  | Hymenoptera | -25.26 | 49.22 | 2.63  | 11.92 |
| 3-2  | Hymenoptera | -26.58 | 57.84 | 2.16  | 8.40  |
| 3-3  | Hymenoptera | -25.80 | 52.32 | 0.74  | 8.57  |
| 3-4  | Hymenoptera | -25.35 | 50.69 | 6.04  | 10.57 |
| 4-1  | Coleoptera  | -22.75 | 59.94 | 1.43  | 7.62  |
| 4-2  | Coleoptera  | -23.94 | 51.18 | 2.06  | 9.43  |
| 4-3  | Coleoptera  | -17.96 | 55.88 | 11.03 | 7.70  |
| 4-4  | Coleoptera  | -27.25 | 50.92 | 6.03  | 10.12 |
| 4-5  | Coleoptera  | -28.47 | 47.39 | 1.07  | 11.35 |
| 4-6  | Coleoptera  | -27.13 | 49.49 | 2.14  | 9.57  |
| 4-7  | Coleoptera  | -32.58 | 50.73 | 1.52  | 9.34  |
| 4-8  | Coleoptera  | -26.53 | 51.22 | 1.50  | 9.72  |
| 4-9  | Coleoptera  | -23.67 | 48.24 | 4.13  | 12.50 |
| 4-10 | Coleoptera  | -24.13 | 49.88 | 7.47  | 10.19 |
| 4-11 | Coleoptera  | -24.37 | 49.98 | 1.22  | 10.77 |
| 4-12 | Coleoptera  | -23.65 | 49.27 | 0.35  | 10.07 |
| 5-1  | Diptera     | -24.76 | 47.78 | 2.58  | 10.60 |
| 5-2  | Diptera     | -25.31 | 49.29 | 4.36  | 11.37 |
| 5-3  | Diptera     | -24.04 | 49.73 | 4.97  | 9.69  |
| 6-1  | Orthoptera  | -25.76 | 49.42 | 1.05  | 10.47 |
| 6-2  | Orthoptera  | -18.79 | 48.72 | 0.58  | 9.70  |
| 6-3  | Orthoptera  | -25.73 | 52.76 | 0.80  | 9.63  |
| 6-4  | Orthoptera  | -25.64 | 47.25 | 1.18  | 12.46 |

Table S2: Feather stable isotope data of *Sitta yunnanensis* and *Sitta nagaensis*

| Sample ID | Species                  | Acquisition time | $\delta^{13}\text{C}$ (‰, PDB) | C content (%) | $\delta^{15}\text{N}$ (‰, Atm-N <sub>2</sub> ) | N content (%) |
|-----------|--------------------------|------------------|--------------------------------|---------------|------------------------------------------------|---------------|
| 1-1       | <i>Sitta yunnanensis</i> | 2018.12.25       | -21.40                         | 44.94         | 4.13                                           | 12.08         |
| 1-2       | <i>Sitta yunnanensis</i> | 2018.12.25       | -20.29                         | 45.07         | 4.69                                           | 12.56         |
| 1-3       | <i>Sitta yunnanensis</i> | 2018.12.25       | -21.25                         | 44.23         | 4.08                                           | 12.06         |
| 1-4       | <i>Sitta yunnanensis</i> | 2018.12.25       | -21.74                         | 45.15         | 5.58                                           | 13.04         |
| 1-5       | <i>Sitta yunnanensis</i> | 2018.12.25       | -20.44                         | 44.07         | 4.87                                           | 13.00         |
| 1-6       | <i>Sitta yunnanensis</i> | 2018.12.25       | -20.98                         | 44.76         | 4.84                                           | 12.79         |
| 1-7       | <i>Sitta yunnanensis</i> | 2018.12.28       | -21.53                         | 46.28         | 2.11                                           | 12.39         |
| 1-8       | <i>Sitta yunnanensis</i> | 2018.12.28       | -21.36                         | 44.74         | 2.33                                           | 12.29         |
| 2-1       | <i>Sitta yunnanensis</i> | 2019.05.01       | -21.61                         | 45.18         | 5.38                                           | 13.27         |
| 2-2       | <i>Sitta yunnanensis</i> | 2019.05.01       | -21.09                         | 44.87         | 5.43                                           | 13.54         |
| 2-3       | <i>Sitta yunnanensis</i> | 2019.05.01       | -19.84                         | 44.48         | 2.91                                           | 12.61         |
| 2-4       | <i>Sitta yunnanensis</i> | 2019.05.01       | -21.40                         | 44.20         | 2.01                                           | 12.50         |
| 2-5       | <i>Sitta yunnanensis</i> | 2019.05.01       | -20.17                         | 46.10         | 3.35                                           | 12.55         |
| 2-6       | <i>Sitta yunnanensis</i> | 2019.05.01       | -20.34                         | 45.66         | 3.45                                           | 13.25         |
| 2-7       | <i>Sitta yunnanensis</i> | 2019.05.01       | -20.17                         | 45.18         | 3.18                                           | 12.09         |
| 2-8       | <i>Sitta yunnanensis</i> | 2019.05.01       | -20.05                         | 46.05         | 3.08                                           | 12.32         |
| 2-9       | <i>Sitta yunnanensis</i> | 2019.05.02       | -20.38                         | 45.02         | 3.43                                           | 12.14         |
| 2-10      | <i>Sitta yunnanensis</i> | 2019.05.02       | -19.78                         | 45.31         | 3.16                                           | 12.19         |
| 2-11      | <i>Sitta yunnanensis</i> | 2019.05.02       | -21.06                         | 45.56         | 3.44                                           | 12.86         |
| 2-12      | <i>Sitta yunnanensis</i> | 2019.05.02       | -21.51                         | 44.67         | 3.62                                           | 12.72         |
| 2-13      | <i>Sitta yunnanensis</i> | 2019.05.02       | -22.68                         | 44.56         | 3.18                                           | 12.55         |
| 2-14      | <i>Sitta yunnanensis</i> | 2019.05.02       | -21.92                         | 43.38         | 2.65                                           | 12.51         |
| 3-1       | <i>Sitta nagaensis</i>   | 2018.12.24       | -23.41                         | 45.77         | 3.29                                           | 12.57         |
| 3-2       | <i>Sitta nagaensis</i>   | 2018.12.24       | -23.49                         | 46.00         | 3.78                                           | 13.16         |

|     |                               |            |        |       |      |       |
|-----|-------------------------------|------------|--------|-------|------|-------|
| 3-3 | <i>Sitta nagaensis</i>        | 2018.12.24 | -23.21 | 45.91 | 2.86 | 12.49 |
| 3-4 | <i>Sitta nagaensis</i>        | 2018.12.24 | -21.59 | 46.69 | 4.30 | 13.54 |
| 4-1 | <i>Sitta nagaensis</i>        | 2019.05.01 | -22.32 | 45.50 | 4.17 | 12.68 |
| 4-2 | <i>Sitta nagaensis</i>        | 2019.05.01 | -21.89 | 45.17 | 4.58 | 13.24 |
| 4-3 | <i>Sitta nagaensis</i>        | 2019.05.02 | -23.11 | 45.30 | 3.59 | 12.46 |
| 4-4 | <i>Sitta nagaensis</i>        | 2019.05.02 | -24.10 | 45.05 | 3.07 | 13.04 |
| 5-1 | <i>Sitta nagaensis</i> (baby) | 2019.05.13 | -23.55 | 45.19 | 3.34 | 12.81 |
| 5-2 | <i>Sitta nagaensis</i> (baby) | 2019.05.13 | -23.68 | 46.11 | 3.21 | 13.56 |
| 5-3 | <i>Sitta nagaensis</i> (baby) | 2019.05.13 | -23.85 | 49.80 | 3.23 | 13.62 |
| 5-4 | <i>Sitta nagaensis</i> (baby) | 2019.05.13 | -23.93 | 48.31 | 3.26 | 13.48 |
| 5-5 | <i>Sitta nagaensis</i> (baby) | 2019.05.13 | -23.96 | 47.48 | 2.90 | 13.90 |
